# Supplementary material for: Bidirectional Underwater Drag Reduction on Bionic Flounder Two-Tier Structural Surfaces
Source: MDPI journal article supplement (doi:10.3390/biomimetics8010116), 2023-03-11
Supplement: s1 [file s1]

Article

# Bidirectional Underwater Drag Reduction on Bionic Flounder Two-Tier Structural Surfaces

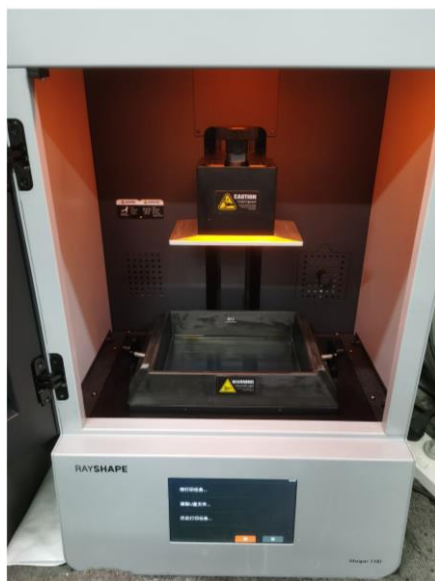

**Figure S1.** Image of 3D printer.

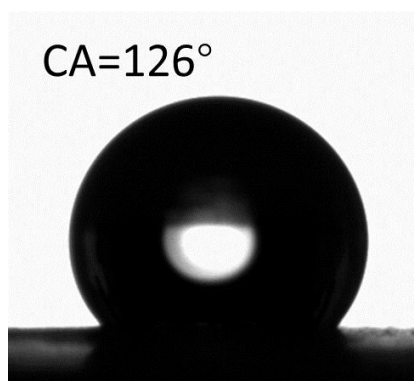

**Figure S2.** Contact angle of the resin after curing.

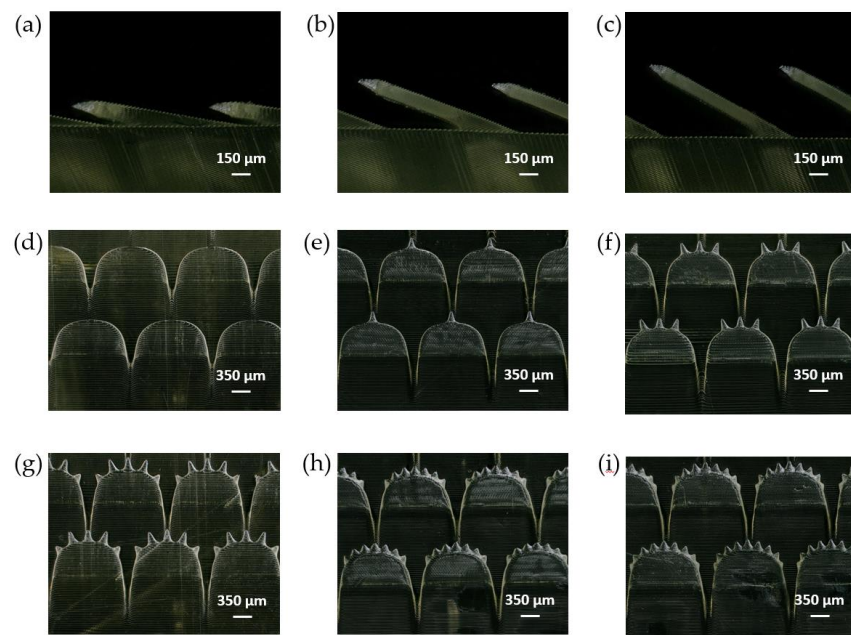

**Figure S3.** The test samples with different  $\alpha$  and  $N$ : (a ~ c) different  $\alpha$ , (d ~ i) different  $N$ .

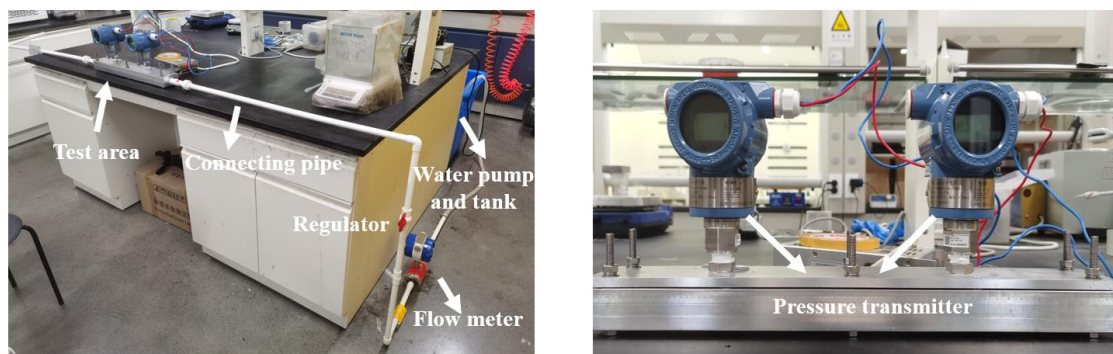

**Figure S4.** Self-built differential pressure resistance test platform.

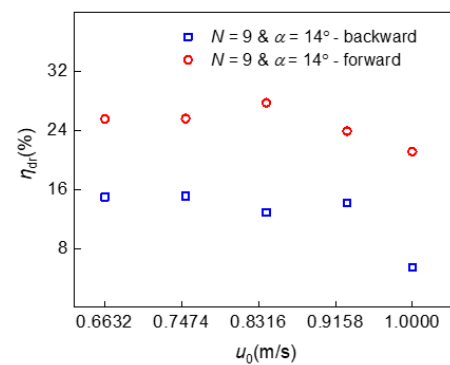

**Figure S5.** Drag reduction at different speeds with  $N = 9$  and  $\alpha = 14^\circ$ .

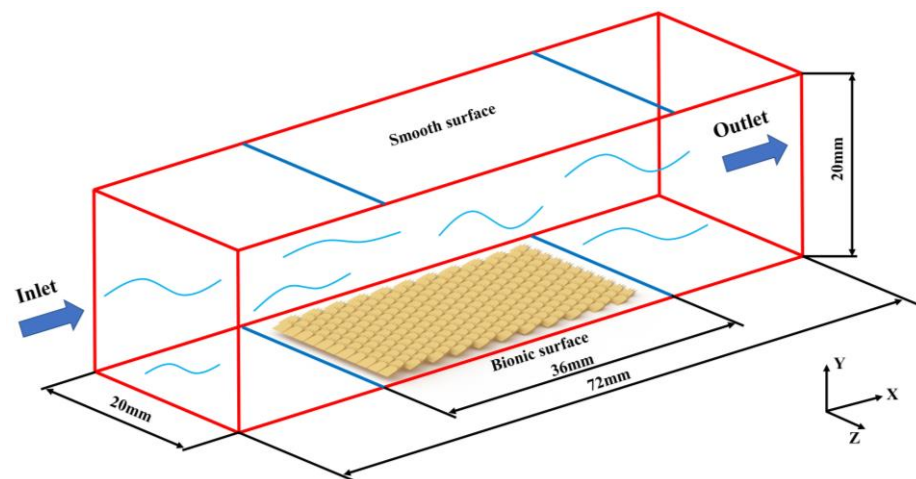

**Figure S6.** Biomimetic surface model for drag reduction experiments simulated by simulation software.

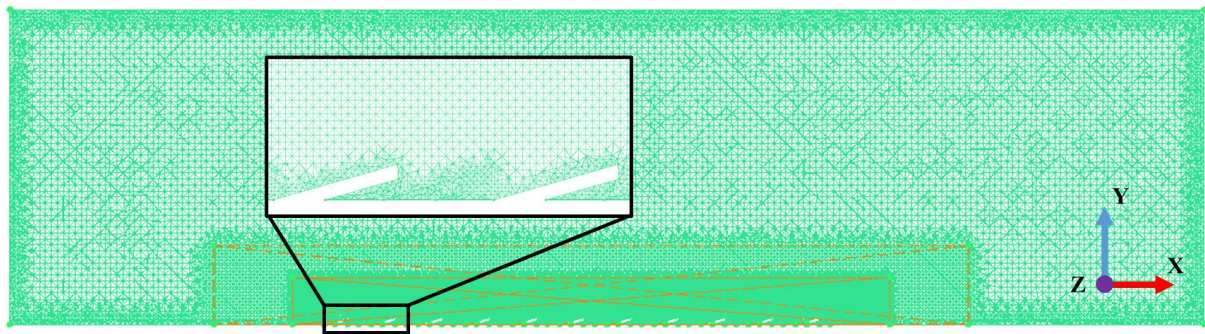

**Figure S7.** Meshing of the computational domain.

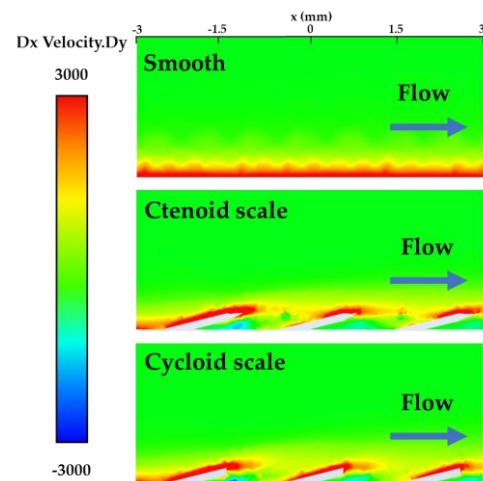

**Figure S8.** Velocity gradient diagram for the near-wall region on different surfaces.
